# Supplementary material for: Reducing the environmental impact of peat use in gardening: a behavioural science approach
Source: Research Square preprint supplement (doi:10.21203/rs.3.rs-8263138/v1), 2025-12-18
Supplement: Supplementary file 1 [file 90e6961ea70e8c1bf6700dc0.docx]

**Supplementary material 1: Full regression model on peat-free compost purchasing behaviour**

An ordinal logistic regression model was estimated to examine the relationship between influences on behaviour and the extent to which participants reported buying peat-free compost. The dependent variable was self-reported current purchasing behaviour of peat-free compost, originally categorised into six groups, as outlined in Supplementary Table 2. Given the lower frequencies of ‘Approximately half of bags contained peat, and half were peat-free’, ‘Mostly peat-containing, a small number were peat-free’ and ‘All contained peat’, and to reduce skewness of the dependent variable for the regression analyses, three groups were formed: (1) ‘Approximately half or more bags contained peat’ (n = 135), (2) ‘Mostly peat-free, a small number contained peat’ (n = 172) and (3) ‘All peat-free’ (n = 627). Given that the dependent variable is ordinal and the ‘Not sure/don’t know’ category could not be meaningfully ordered or placed on a numeric scale, this category was removed for the regression analyses. The independent variables (IVs) were participants’ agreement ratings to the 22 COM-B statements (Figure 3).

Variance inflation factors (VIFs) were examined, with most VIF values below 5, indicating that multicollinearity was not a major concern. Two IVs had VIFs equal to or above 5: ‘Choosing peat-free compost aligns with my values of environmental sustainability’ (5.73) and ‘I am in the habit of choosing peat-free over compost based on peat’ (4.99), which suggests moderate correlation with other predictors. The first of these statements was highly correlated with ‘I believe that buying peat-free compost is more environmentally friendly than compost based on peat’ (0.86). Therefore, these two statements were combined into one variable. Despite the COM-B statement ‘I am in the habit of choosing peat-free over compost based on peat’ exhibited a strong association with the dependent variable (β = 0.76), it was excluded from the final regression model due to likely conceptual overlap with the DV. Specifically, it is likely that participants interpreted this statement as a measure of the frequency of their behaviour rather than a cue-response triggered behaviour. So rather than reflecting an Automatic Motivation influence on behaviour, this IV likely measured a similar construct to the DV. In support of this, a paper by Brown, Hagger and Hamilton (2024)[[1]](#footnote-1) describes the difficulty individuals have with accurately representing their habits due to issues such as limited understanding of the cue-based mechanisms that experts consider central to habit formation. Moreover, removing this IV from the model reduced the risk of obscuring the contributions of other influences on behaviour in the model. This decision was important given that significant IVs in the model would later help inform the development of interventions targeting buying behaviour.

The model was rerun with 19 IVs and all VIFs were below the commonly accepted threshold of 5, with corresponding tolerance values above 0.25, suggesting that multicollinearity was not a concern. A Brant test was conducted to assess the proportional odds assumption (χ² = 14.65, df = 20, *p* = .80). The non-significant result suggests that the assumption was met, indicating that the ordinal logistic regression was appropriate.

**Supplementary material 2: Full regression model on peat-free plant purchasing behaviour**

An ordinal logistic regression analysis was estimated to examine the relationship between potential influences on behaviour, each categorised to a COM-B domain, and the extent to which participants reported buying peat-free plants. The dependent variable was self-reported current purchasing behaviour of peat-free plants, originally categorised into six groups: ‘Grown 100% peat-free’ (110 respondents), ‘Mostly grown peat-free with some having peat in’ (231 respondents), ‘Approximately half were grown in peat, and half were grown peat-free’ (62 respondents), ‘Mostly grown in peat’ (24 respondents), ‘All grown in peat’ (6 respondents) and ‘Not sure / don't know’ (503 respondents).

To structure the model similarly to the model on buying peat-free compost, three groups were formed for the DV: (1) ‘Approximately half or more plants were grown in peat’ (92 respondents), (2) Mostly grown peat-free with some having peat in’ (231 respondents) and (3) ‘Grown 100% peat-free’ (110 respondents). Despite over half of respondents reporting ‘Not sure / don't know’, this category was removed for the regression analyses due to not fitting meaningfully on an ordinal scale. The IVs were participants’ agreement ratings to 19 COM-B statements (Figure 4). VIFs were examined, with most predictors having acceptable levels of collinearity (VIF < 5), except for ‘I believe that choosing 100% peat-free plants is important for protecting the environment’ (VIF = 5.55) and ‘Choosing peat-free plants aligns with my values of environmental sustainability’ (VIF = 7.01). These two statements both relating to Reflective Motivation, with regards to self-identity and values of environmental sustainability, were highly correlated (0.895), and therefore were combined to form a single variable. The statement ‘I am in the habit of choosing peat-free over compost based on peat’ was removed for the same reasons outlined above for the model on buying peat-free compost. The model was rerun with 17 IVs, and all VIFs were below the commonly accepted threshold of 5, with corresponding tolerance values above 0.1.

**Supplementary Table 1.** Demographic and gardening characteristics of sample.

| **Respondent Demographics (missing datapoints = 40)** | **% (n)** |
| --- | --- |
| **Gender** | |
| Female | 78.9 (721) |
| Male | 20.2 (185) |
| Other | 0.1 (1) |
| Prefer not to say | 0.8 (7) |
| **Age** | |
| 18-24 | 1 (9) |
| 25-34 | 4.8 (44) |
| 35-44 | 6.3 (58) |
| 45-54 | 10.3 (94) |
| 55-64 | 27 (247) |
| 65-74 | 34.2 (313) |
| 75-84 | 13.6 (124) |
| 85+ | 1.1 (10) |
| Prefer not to say | 1.6 (15) |
| **Employment status** | |
| Employed (full-time) | 19.0 (174) |
| Employed (part-time) | 10.1 (92) |
| Self-employed | 9.1 (83) |
| On parental leave | 0.2 (2) |
| Homemaker/stay-at-home parent | 1.3 (12) |
| Retired | 55.8 (510) |
| Student | 0.9 (8) |
| In receipt of state benefits | 0.4 (4) |
| Other | 1.8 (16) |
| Prefer not to say | 1.4 (13) |
| **Highest level of completed education** | |
| Primary school | 0.2 (2) |
| GCSE-level or equivalent | 7.2 (66) |
| A-level or equivalent | 12.5 (114) |
| Foundation degree or equivalent | 11.3 (103) |
| Bachelors degree | 35.6 (325) |
| Masters degree | 23.1 (211) |
| Doctorate | 7.3 (67) |
| Prefer not to say | 2.8 (26) |
| **Overall personal financial situation** | |
| Live comfortably | 58.5 (535) |
| Meet needs with a little left | 29 (265) |
| Just meet basic expenses | 5.4 (49) |
| Don't meet basic expenses | 0.3 (3) |
| Prefer not to say | 6.8 (62) |
| **Ethnicity** | |
| Asian or Asian British | 1.3 (12) |
| Black, Black British, Caribbean or African | 0.4 (4) |
| Mixed or multiple ethnic groups | 1.2 (11) |
| White | 92.9 (849) |
| Any other ethnic group | 0.5 (5) |
| Prefer not to say | 3.6 (33) |
| **UK region** | |
| East | 7.4 (68) |
| East Midlands | 6 (55) |
| Greater London | 10.1 (92) |
| North East | 3.1 (28) |
| North West | 11.5 (105) |
| South East | 26.7 (244) |
| South West | 12.8 (126) |
| West Midlands | 6 (55) |
| Yorkshire & the Humber | 7 (64) |
| Northern Ireland | 0.3 (3) |
| Scotland | 5.1 (47) |
| Wales | 2.2 (20) |
| Prefer not to say | 0.8 (7) |
| **Gardening characteristics (no missing datapoints)** | |
| **Gardening space** | |
| Private garden | 78.5 (749) |
| Indoors (e.g., houseplants) | 95.3 (909) |
| Greenhouse | 21.6 (206) |
| Balcony or patio | 52.9 (505) |
| Allotment | 4.72 (45) |
| Communal garden (e.g., within a shared growing space) | 19.8 (189) |
| Other type of gardening space | 7.65 (73) |
| **Gardening expertise** | |
| No expertise | 0.8 (8) |
| Limited expertise | 11.4 (109) |
| Some expertise | 32.0 (305) |
| Good expertise | 37.5 (358) |
| Very good expertise | 12.3 (117) |
| Professional level expertise | 6.0 (57) |
| **Gardening as part of profession** | |
| Yes | 10.6 (101) |
| No | 89.4 (853) |
| **First started gardening** | |
| Less than a year ago | 0.4 (4) |
| 1-5 years ago | 6.7 (64) |
| 6-10 years ago | 5.2 (50) |
| 11-15 years ago | 4.7 (45) |
| 16-20 years ago | 5.5 (52) |
| 21-25 years ago | 5.1 (49) |
| 25+ years ago | 72.3 (690) |
| **Member of Royal Horticultural Society (missing datapoints = 40)** | |
| Yes | 68.3 (624) |
| No | 31.7 (290) |

**Supplementary Table 2.** Self-reported proportion of peat-free compost bought since the beginning of 2024

| **‘Overall, the compost bags I bought this year were:’** | **% (n)** |
| --- | --- |
| All peat-free | 65.7 (627) |
| Mostly peat-free, a small number contained peat | 18.0 (172) |
| Approximately half of bags contained peat, and half were peat-free | 7.0 (67) |
| Mostly peat-containing, a small number were peat-free | 4.5 (43) |
| All contained peat | 2.6 (25) |
| Not sure / don't know | 2.1 (20) |

**Supplementary Table 3.** Agreement ratings to statements measuring future intention to buy peat-free compost

|  | % (n) | | | | | | |
| --- | --- | --- | --- | --- | --- | --- | --- |
|  | Strongly disagree | Disagree | Somewhat disagree | Undecided | Somewhat agree | Agree | Strongly agree |
| I intend to choose peat-free compost | 5.8 (55) | 4.9 (47) | 2.5 (24) | 8.6 (82) | 8.2 (78) | 18.8 (179) | 51.3 (489) |
| I want to choose peat-free compost | 5.1 (49) | 3.8 (36) | 2.3 (22) | 5.5 (52) | 8.5 (81) | 20.4 (195) | 54.4 (519) |
| I expect I will choose peat-free compost | 4.7 (45) | 4.2 (40) | 2.7 (26) | 8.3 (79) | 8.0 (76) | 22.0 (210) | 50.1 (478) |

**Supplementary Table 4.** Self-reported proportion of peat-free plants bought since the beginning of 2024

| **Overall, the plants I bought this year were:** | **% (n)** |
| --- | --- |
| Grown 100% peat-free | 11.8 (110) |
| Mostly grown peat-free with some having peat in | 24.7 (231) |
| Approximately half were grown in peat, and half were grown peat-free | 6.6 (62) |
| Mostly grown in peat | 2.6 (24) |
| All grown in peat | 0.6 (6) |
| Not sure / don't know | 53.7 (503) |

**Supplementary Table 5.** Agreement ratings to statements measuring future intention to buy peat-free plants

|  | % (n) | | | | | | |
| --- | --- | --- | --- | --- | --- | --- | --- |
|  | Strongly disagree | Disagree | Somewhat disagree | Undecided | Somewhat agree | Agree | Strongly agree |
| ‘I intend to buy plants which have been grown 100% peat-free’ | 5.0 (47) | 5.9 (55) | 5.6 (52) | 17.5 (164) | 24.4 (228) | 24.3 (227) | 17.4 (163) |
| ‘I want to buy plants which have been grown 100% peat-free’ | 4.6 (43) | 4.4 (41) | 3.3 (31) | 10.9 (102) | 17.5 (164) | 26.8 (251) | 32.5 (304) |
| ‘I expect I will buy plants which have been grown 100% peat-free’ | 4.4 (41) | 5.3 (50) | 6.6 (62) | 19.3 (181) | 26.4 (247) | 22.8 (213) | 15.2 (142) |

**Supplementary Table 6.** Bivariate correlations between COM-B items and peat-free compost purchasing behaviour

|  | | Psychological Capability | | | | | | | Physical Opportunity | | | | Social Opportunity | | | Reflective Motivation | | | | Automatic Motivation | | | |
| --- | --- | --- | --- | --- | --- | --- | --- | --- | --- | --- | --- | --- | --- | --- | --- | --- | --- | --- | --- | --- | --- | --- | --- |
| I know what 'peat-free' compost means | I don’t think about whether a bag of compost contains peat or not | I know where to find information on how to choose the right peat-free compost for my specific gardening needs | I know how to adjust my feeding practices when using peat-free compost to achieve best results | I know how to adjust my watering practices when using peat-free compost to achieve best results | I know how to store peat-free compost to prevent it from deteriorating | If I don’t know whether a bag of compost is peat-free, I read the packaging or ask someone | Compost packages are clearly labelled to indicate they are peat-free | My usual shop has a clear sign to indicate which compost is peat-free | Peat-free compost is readily available in my usual shop | Peat-free compost is more expensive than compost based on peat | Organisations I trust recommend peat-free over peat-based compost | Organisations I trust are critical of the use of peat-based compost | Other people I trust have had good experiences using peat-free compost | I believe that buying peat-free compost is more environmentally friendly than compost based on peat | Choosing peat-free compost aligns with my values of environmental sustainability | I think that peat-free compost will give me lower quality results than compost based on peat | Looking for ‘peat-free’ on packaging is a priority for me when choosing compost | I am in the habit of choosing peat-free over compost based on peat | I feel guilty if the compost I buy contains peat | The texture and/or smell of peat-free compost is off-putting | I feel good about choosing peat-free over compost based on peat |
| Peat-free compost purchasing behaviour | Correlation Coefficient | .135** | -.319** | .173** | 0.059 | 0.047 | 0.094 | .294** | 0.046 | 0.037 | .127** | -.206** | .280** | 0.087 | .360** | .434** | .499** | -.362** | .586** | .637** | .483** | -.315** | .475** |
| Sig. (2-tailed) | 0.000 | 0.000 | 0.000 | 0.074 | 0.155 | 0.004 | 0.000 | 0.156 | 0.256 | 0.000 | 0.000 | 0.000 | 0.007 | 0.000 | 0.000 | 0.000 | 0.000 | 0.000 | 0.000 | 0.000 | 0.000 | 0.000 |
| N | 934 | 934 | 934 | 934 | 934 | 934 | 934 | 934 | 934 | 934 | 934 | 934 | 934 | 934 | 934 | 934 | 934 | 934 | 934 | 934 | 934 | 934 |

Note: ***p* < 0.00227 (Bonferroni-corrected)

**Supplementary Table 7.** Ordinal logistic regression coefficients predicting peat-free compost purchasing behaviour (highlighted in red are significant negative predictors, in green are significant positive predictors)

| **COM-B Domain** | **Predictor** | **Estimate (β)** | **SE** | **t-value** | **p-value** |
| --- | --- | --- | --- | --- | --- |
| **Psychological Capability** | I know what ‘peat-free’ compost means | 0.022 | 0.079 | 0.282 | 0.778 |
| I don’t think about whether a bag of compost contains peat or not | 0.039 | 0.054 | 0.712 | 0.477 |
| I know where to find information on how to choose the right peat-free compost for my specific gardening needs | -0.014 | 0.059 | -0.242 | 0.809 |
| I know how to adjust my feeding practices when using peat-free compost to achieve best results | 0.136 | 0.095 | 1.432 | 0.152 |
| I know how to adjust my watering practices when using peat-free compost to achieve best results | -0.231 | 0.093 | -2.481 | 0.013 |
| I know how to store peat-free compost to prevent it from deteriorating | 0.070 | 0.058 | 1.203 | 0.229 |
| If I don’t know whether a bag of compost is peat-free, I read the packaging or ask someone | -0.037 | 0.057 | -0.640 | 0.523 |
| **Physical Opportunity** | Compost packages are clearly labelled to indicate they are peat-free | 0.080 | 0.065 | 1.223 | 0.222 |
| My usual shop has a clear sign to indicate which compost is peat-free | -0.060 | 0.058 | -1.030 | 0.303 |
| Peat-free compost is readily available in my usual shop | 0.241 | 0.083 | 2.909 | 0.004 |
| Peat-free compost is more expensive than compost based on peat | -0.306 | 0.062 | -4.945 | <.001 |
| **Social Opportunity** | Organisations I trust recommend peat-free over peat-based compost | 0.134 | 0.068 | 1.979 | 0.047 |
| Organisations I trust are critical of the use of peat-based compost | -0.012 | 0.047 | -0.249 | 0.803 |
| Other people I trust have had good experiences using peat-free compost | 0.111 | 0.072 | 1.544 | 0.123 |
| **Reflective Motivation** | I believe that buying peat-free compost is more environmentally friendly than compost based on peat +  Choosing peat-free compost aligns with my values of environmental sustainability | -0.162 | 0.099 | -1.640 | 0.101 |
| I think that peat-free compost will give me lower quality results than compost based on peat | 0.004 | 0.066 | 0.065 | 0.948 |
| Looking for ‘peat-free’ on packaging is a priority for me when choosing compost | 0.652 | 0.075 | 8.709 | <.001 |
| **Automatic Motivation** | I feel guilty if the compost I buy contains peat | -0.081 | 0.065 | 1.244 | 0.213 |
| The texture and/or smell of peat-free compost is off-putting | -0.150 | 0.050 | -3.027 | 0.003 |
| I feel good about choosing peat-free over compost based on peat | 0.060 | 0.086 | 0.706 | 0.480 |

Note. β = log-odds coefficient; SE = standard error.

**Supplementary Table 8.** Bivariate correlations between COM-B items and peat-free plant purchasing behaviour

|  | | Psychological Capability | | | | | | Physical Opportunity | | | Social Opportunity | | | Reflective Motivation | | | | Automatic Motivation | | |
| --- | --- | --- | --- | --- | --- | --- | --- | --- | --- | --- | --- | --- | --- | --- | --- | --- | --- | --- | --- | --- |
| I understand what is meant by a ‘100% peat-free' plant | I don't think about whether or not a plant has been grown peat-free | I know the difference between ‘100% peat-free’ and ‘peat-free grown’ | I know where I can buy plants which were grown 100% peat-free | I know what the environmental impacts of peat extraction are | I often forget to check the label on plants to see whether there is information on peat-free | Plants labelled as 100% peat-free are readily available in my usual shop | My usual shop has a clear sign to indicate which plants are 100% peat-free | Peat-free plants are more expensive than plants grown in peat | Organisations I trust recommend buying peat-free plants | Other people I trust have had good results with peat-free plants | Organisations I trust are critical of buying plants which have not been grown peat-free | I believe that choosing 100% peat-free plants is important for protecting the environment | Choosing peat-free plants aligns with my values of environmental sustainability | It is important for me that the plants I buy have not been grown in peat | I think peat-free plants may not grow as successfully as those grown in peat | I am in the habit of choosing peat-free plants | I feel guilty if I buy a plant grown in peat | I feel good by choosing peat-free plants over plants grown in peat |
| Peat-free plant purchasing behaviour | Correlation Coefficient | 0.002 | -0.13 | 0.008 | .326** | 0.017 | -.152** | .363** | .293** | -0.085 | 0.143 | 0.133 | .188** | .166** | .166** | .274** | -0.088 | .400** | .274** | .208** |
| Sig. (2-tailed) | 0.972 | 0.007 | 0.873 | 0.000 | 0.729 | 0.002 | 0.000 | 0.000 | 0.078 | 0.003 | 0.006 | 0.000 | 0.001 | 0.001 | 0.000 | 0.066 | 0.000 | 0.000 | 0.000 |
| N | 433 | 433 | 433 | 433 | 433 | 433 | 433 | 433 | 433 | 433 | 433 | 433 | 433 | 433 | 433 | 433 | 433 | 433 | 433 |

Note. ***p* < 0.0026 (Bonferroni-corrected)

**Supplementary Table 9.** Ordinal logistic regression coefficients predicting peat-free plant purchasing behaviour (highlighted in red are significant negative predictors, in green are significant positive predictors)

| **COM-B Domain** | **Predictor** | **Estimate (β)** | **SE** | **t-value** | **p-value** |
| --- | --- | --- | --- | --- | --- |
| **Psychological Capability** | I understand what is meant by a ‘100% peat-free' plant | -0.060 | 0.0877 | -0.6812 | 0.4958 |
| I don't think about whether or not a plant has been grown peat-free | 0.1746 | 0.0683 | 2.5585 | 0.0105 |
| I know the difference between ‘100% peat-free’ and ‘peat-free grown’ | -0.1243 | 0.0581 | -2.1404 | 0.0323 |
| I know where I can buy plants which were grown 100% peat-free | 0.2327 | 0.0741 | 3.1405 | 0.0017 |
| I know what the environmental impacts of peat extraction are | -0.2736 | 0.1185 | -2.3084 | 0.0210 |
| I often forget to check the label on plants to see whether there is information on peat-free | -0.0817 | 0.0631 | -1.2946 | 0.1955 |
| **Physical Opportunity** | Plants labelled as 100% peat-free are readily available in my usual shop | 0.3418 | 0.0932 | 3.6695 | 0.0002 |
| My usual shop has a clear sign to indicate which plants are 100% peat-free | 0.1008 | 0.0792 | 1.2722 | 0.2033 |
| Peat-free plants are more expensive than plants grown in peat | -0.1059 | 0.0867 | -1.2225 | 0.2215 |
| **Social Opportunity** | Organisations I trust recommend buying peat-free plants | -0.1612 | 0.0947 | -1.7026 | 0.0886 |
| Other people I trust have had good results with peat-free plants | -0.0666 | 0.0827 | -0.8054 | 0.4206 |
| Organisations I trust are critical of buying plants which have not been grown peat-free | 0.0758 | 0.0734 | 1.0330 | 0.3016 |
| **Reflective Motivation** | I believe that choosing 100% peat-free plants is important for protecting the environment +  Choosing peat-free plants aligns with my values of environmental sustainability | 0.1285 | 0.1407 | 0.9132 | 0.3611 |
| It is important for me that the plants I buy have not been grown in peat | 0.2376 | 0.1077 | 2.2060 | 0.0274 |
| I think peat-free plants may not grow as successfully as those grown in peat | 0.0211 | 0.0696 | 0.3035 | 0.7615 |
| **Automatic Motivation** | I feel guilty if I buy a plant grown in peat | 0.1400 | 1.5786 | 1.5786 | 0.1144 |
| I feel good by choosing peat-free plants over plants grown in peat | 0.0728 | 0.6443 | 0.6443 | 0.5194 |

Note. β = log-odds coefficient; SE = standard error.

**Supplementary Table 10.** Descriptions, frequencies and quotes for generated themes of influences on buying peat-free compost

| **COM-B domain** | **Theme** | **Theme description** | **Frequency** | **Barrier / Enabler / Mixed** | **Example Quote(s)** |
| --- | --- | --- | --- | --- | --- |
| **Psychological Capability** | Knowledge about the properties of peat-free compost | Knowledge/certainty about the ingredients, effectiveness, origins and quality of peat-free compost | 11 | Mixed | *‘Hard to know what peat free is actually made of’* |
| Knowledge about the environmental and cultural impacts of peat extraction | a) Knowledge about the environmental role of peatlands, such as carbon capture, biodiversity and flood prevention  b) Awareness of non-environmental impacts, such as damage to archaeological sites caused by peat extraction | 14 |  | *‘Peat is nature's best carbon store, helps mitigate flooding, supports highly adapted biodiversity’*  *‘I am an archaeologist. There are numerous archaeological sites buried within the peat that are damaged during the extraction process.’* |
| Knowledge that using peat-free compost effectively requires adjusting gardening practices | Knowledge that peat-free compost requires different approaches compared to peat-based options, such as mixing with other materials and adjusting watering regimes | 9 | Mixed | *‘More difficult to tell when it needs watering’* |
| **Physical Opportunity** | Inconsistent/low quality of peat-free compost | The quality and consistency of peat-free compost vary between brands, as well as different batches of the same brand. This includes variability of ingredients, nutrients and texture.  There can be contaminants such as plastic, large twigs, clumps not broken down, stones, glass, shredded paper, weeds, fungus gnats. | 72 | Barrier | *‘Quality of peat free is so very variable, until you open the bag you've no idea of its quality, even for top brands. There needs to be a industry standard for peat free.’* |
| Signage and labelling of peat-free compost | Signage and labelling of peat-free compost bags in usual shop | 4 |  | *‘I would only know it is peat-free from labelling on the front of the bag’*  *‘It's easy because at my local garden centres all bags are clearly labelled.’* |
| Cost | a) Higher-quality peat-free options are perceived as expensive and cheaper options deliver mixed results  b) Added expense of supplements to improve peat-free compost | 12 | Barrier | *‘The higher cost is also off putting.’*  *‘The price of having to buy other items such as perlite and grit to make a peat free mix that’s likely to make growing plants successful’* |
| Lack of space at home to carry out additional behaviours needed for using peat-free compost | Lack of space at home to carry out additional behaviours (e.g., mixing composts) and keep extra products needed for using peat-free compost | 1 | Barrier | *‘Professional gardeners have the space for mixing peat free compost, adding their own leaf mould or whatever to it to help it retain water. Ordinary gardeners don’t have the space to keep all these extras.’* |
| Availability of peat-free vs peat-based compost at retailers | Wide availability of peat-free compost but limited availability of high-quality or specialty peat-free compost. Some shops still stock “sustainable” peat-based options | 38 |  | *‘It's hard to find peat free seed/fine compost’*  *‘There is no choice to buy compost containing peat, most retailers are not stocking compost containing peat’* |
| Information about the properties of peat-free compost | Information on exact ingredients and how different peat-free materials perform differently. Lack of clear watering and feeding instructions on compost bags and other associated products | 12 |  | *‘I wish watering instructions were added to peat free compost in bold to help with its growing conditions’*  *‘I’d like a breakdown printed on the packaging showing the constituent ingredients and their percentages as composts vary so much in their composition’* |
| **Social Opportunity** | Variable messages from trusted sources about peat-free compost | Social influences may affect perceptions of peat-free compost, with mixed reports from friends, gardening groups and professionals about plant growth challenges and carbon footprint concerns, while gardening organisations and media promote peat-free options | 19 | Mixed | *‘I and people I have spoken say they have very poor results from peat free products’*  *‘RHS and TV gardeners recommend peat free’*  *‘a recent discussion with a national trust gardener made me think about the peat free ingredients some being flown into the UK.’*  *‘We bought compost with peat to pot up a saracenia based on the seller's recommendation’* |
| **Reflective Motivation** | Environmental beliefs about peat-free compost | Perceptions about the environmental impacts of peat-free compost are mixed, with some viewing it as a sustainable choice despite poorer results, while others question its sustainability due to sourcing, water usage and ethical concerns | 48 | Mixed | *‘I believe that I am helping the environment by buying peat free’*  *‘It is led by ethics not by whether it works better for growing’*  *‘I don’t believe that peat based compost is harming the planet. There are huge peat areas in Canada and our peat based products do not generally come from the UK and peat free also don’t come without air miles’* |
| Previous experiences with peat-free compost | Previous experiences with peat-free compost are mixed, with many reporting poor plant growth and water retention issues, while others find it effective and easy to use | 170 | Mixed | *‘The abysmal results I have had using peat-free!’*  *‘My experience of growing and germinating seeds in peat free compost has been disappointing enough to discourage me to grow further seeds and plants’*  *‘I have used peat-free compost for many years with good success.’* |
| Conditional willingness to use peat-free compost | Willingness to buy peat-free compost is conditional on its performance matching that of peat-based compost | 6 |  | *‘Peat is what I currently grow in but I would love to move away from peat if a viable and eco friendly option is found.’* |
| Belief that certain plants need peat | Belief that some plants (e.g., carnivorous) need peat to grow/don’t thrive in peat-free compost | 4 | Barrier | *‘The plants I grow need peat’* |
| Belief that peat should still be used if already extracted and still available | Belief that since peat has already been extracted and bagged, the environmental damage is done and so using it does not contribute further harm. Willingness to prioritise gardening success, even if it involves peat-based products | 2 |  | *‘If it’s already bagged it is too late to save it’* |
| Belief that the impact of home gardeners’ peat-use is insignificant | Belief that home gardeners are being unfairly targeted to stop using peat, viewing it as disproportionate compared to the impact of commercial sectors and other countries. | 3 |  | *‘There is far too much 'hype' about gardeners using peat free compost. Research has shown that gardeners use very little peat compared to commercial outlets especially abroad.’* |
| Other factors are more important than peat content | Other factors (e.g., size of bag, buying local, organic, price, plant requirements) take precedence over ‘peat-free’ when choosing compost | 16 |  | *‘I do care about environment but I also care for my plants so I choose compost based on what my plants need.’*  *‘The price of the compost is my main consideration’* |
| Affiliation of ‘peat-free’ with political or cultural movement | ‘Peat-free’ is affiliated with a political or cultural movement they oppose | 1 | Barrier | *‘Peat free compost is associated with Wokeism, Leftism and control of the masses by the "liberal elite"’* |
| **Automatic Motivation** | Emotional and physical reactions towards peat-free compost | Frustration with peat-free compost due to poor plant performance, unpleasant textures and odours, inconsistent quality and concerns about pests and water retention | 50 |  | *‘I'm trying but I find it depressing. So many more plants fail to thrive.’*  *‘I dislike the texture of peat free composts and have difficulty sieving them.’* |
| Guilt-driven behaviour change | Feeling guilty about the environmental impact of peat extraction | 1 | Enabler | *‘I have transitioned out of guilt and realisation of what we are doing to the environment’* |
| Emotional response to peatland destruction | Strong negative feelings linked to the visual imagery of the environmental damage associated with peatland destruction | 1 | Enabler | *‘The thought of the destruction of peat bogs just for us to garden with makes me really cross. I would NEVER buy peat based compost.’* |

**Supplementary Table 11.** Descriptions, frequencies and quotes for generated themes of influences on buying peat-free plants.

| **COM-B domain** | **Theme** | **Theme description** | **Frequency** | **Barrier / Enabler / Mixed** | **Example Quote(s)** |
| --- | --- | --- | --- | --- | --- |
| **Psychological Capability** | Knowledge about peat | Knowledge about peat, particularly with regards to its environmental impact | 3 | Mixed | *‘Peat cutting in Ireland is obviously destructive’*  *‘I’ve literally never heard of peat before.’* |
| Awareness that plants may contain peat | Many reported having not previously thought of ‘peat-free’ in relation to plants, despite being aware of ‘peat-free’ in relation to bags of compost.  Some people assume that plants are already grown peat-free due to legislation. | 50 |  | *‘Although I always buy peat free compost, it's never occurred to me to check whether the plants I buy were grown peat free. I will now be checking’*  *‘Also the assumption (but probably wrong) that growers are already peat free as they have had to abide by legislation.’* |
| Uncertainty about impacts of peat-use at different stages of plant growth | Lack of certainty of how peat use varies across the growing cycle and which phases are most environmentally damaging | 1 |  | *‘So many stages of growing from seed to mature plants - Im unclear about which most damaging in terms of use of peat and volumes’* |
| Peat-free as a consideration at the point of purchase | Peat-free status is often overlooked when buying a plant, though some gardeners specifically seek peat-free grown plants | 3 |  | *‘I forget in the excitement of buying a new plant’*  *‘I don’t buy from markets unless they use peat free soil’* |
| **Physical Opportunity** | Labelling of peat-free plants | Insufficient labelling and signage leave consumers uncertain about which plants are peat-free, with ambiguity around terms such as '100% peat-free,' 'peat-reduced,' and 'peat-free grown' | 60 | Barrier | *‘I have never seen a sign for a peat-free-grown plant’*  *‘Again, "peat free" is ambiguous. Unless I know what actually materials were used to grow the plant, it is difficult to determine the best care as water/feed requirements vary according to the material. Peat was/is broadly consistent, peat substitutes are not.’* |
| Availability of peat-free plants | Limited availability and access to peat-free plants, especially for ‘unusual’ or ‘special’ varieties, compounded by lack of information on local peat-free nurseries | 45 | Barrier | *‘Availability. Compost is readily available, peat free grown plants are not.’*  *‘I grow carnivorous plants which are not always possible to purchase peat free’*  *‘No nursery I know of uses peat free for pot plants’* |
| Time constraints when shopping | Not having the time to examine each plant for peat-free information, especially when labels are unclear or absent | 1 | Barrier | *‘This year it’s purely come down to having to buy a large amount of plants from many different places and simply not having enough time to check them all to see if they’re peat free sadly.’* |
| Price | Peat-free plants may be more expensive or special offers on peat-grown plants might influence buying | 11 |  | *‘I try to avoid peat-grown, but if they are in the 'reduced section', I sometimes crack, especially in Home Bargains, when they are sometimes 30p for a perennial.’*  *‘Price is a big factor for me as I’m on a budget’* |
| Lack of optimum conditions at home to maintain peat-free grown plants | Not having the same growing conditions at home as nurseries, which affects success with maintaining peat-free plants | 1 | Barrier | *‘I am having less success than I use to have with plants grown on in pots of peat free compost. The nurseries grow in optimum conditions. I can’t.’* |
| **Social Opportunity** | Plants gifted from other people | People may gift plants which have not been grown peat-free | 1 |  | *‘I also get given plants by neighbours that are not always grown in peat free compost’* |
| Mixed experiences and opinions around peat-free amongst peers and professionals | Conflicting reports from peers and the horticulture industry about the effectiveness of peat-free plants, with some highlighting negative experiences | 5 |  | *‘In mine and my friends experience peat free does not produce good results’*  *‘Division in the horticulture industry over the need for and outcomes of a peat-free transition.’* |
| Peers campaigning to protect peatlands | Friends or community members advocating for peatland protection | 1 | Enabler | *‘My friend is campaigning to protect eskdalemuir from a woodland company - who want to plant in peat hillsides.’* |
| Limited knowledge amongst retail staff | Staff at garden centres and nurseries may lack knowledge about the growing media used in the plants they sell | 2 | Barrier | *‘I regularly find staff selling plants don't know what they were grown in and often know nothing about the plants they sell.’* |
| Social norms around discussing peat use | In some social settings, such as plant swaps, clubs or community sales, discussing peat use may be perceived as inappropriate or potentially offensive | 1 | Barrier | *‘I buy plant mostly from gardening club, open gardens and church sales or sharing with friends. I would not ask any of them about peat as it would be offensive’* |
| Lack of information about peat-free plants from trusted sources | Lack of information about peat-free in relation to plants from garden organisations and magazines | 2 | Barrier | *‘I feel very strongly about buying peat free compost but haven't paid as much attention to plants grown in peat free compost mainly due to there being less about this discussed in garden organisations/magazines etc peat free’* |
| **Reflective Motivation** | Environmental responsibility and moral beliefs | Feeling a strong moral obligation to avoid peat-grown plants due to concerns about the environmental impact of peat extraction | 2 | Enabler | *‘Again it is morally wrong to buy peat based products or plants during a climate emergency’* |
| Prioritising plant health and visual appeal over peat-free status | Quality, health and appearance of plant take precedence when choosing a plant over peat content | 19 | Barrier | *‘I buy plants based on their health and apparent potential to grow and prosper. Only consideration’*  *‘When in a shop and, ‘Oo that’s a pretty plant….’ Am I really going to get in the car and tour around to try to find the pretty plant in peat free?’* |
| Prioritising local or British-grown plants | Buying locally or choosing British-grown plants is important for some, even if local businesses use peat. Loyalty to local growers and perceived environmental benefits of reduced travel might outweigh peat concerns | 4 | Barrier | *‘My local nursery only grows in peat (...) I still buy from him as I want to support his local business.’* |
| Preference for growing from seed | Preference for growing from seed and avoiding buying containerised plants | 6 |  | *‘I only buy plants if I can’t get seeds. Seeds are my preference.’* |
| Belief that responsibility lies beyond the consumer | Belief that consumers have limited control over how the plants they buy have been produced, and that it is a regulatory issue rather than up to consumers’ behaviours to choose peat-free | 3 |  | *‘I have no control over how they are produced’* |
| Previous negative experiences with peat-free products | Previous negative experiences with peat-free compost and plants (e.g., poor growth, inconsistent compost quality, insects) | 25 |  | *‘All peat free plants I’ve bought have struggled and not been healthy at all’* |
| Motivation to buy peat-free but find peat-free plant care difficult to manage | Motivation to choose peat-free plants but find the practicalities of plant care, especially watering, to be challenging | 4 |  | *‘Peat free growing is more high maintenance certainly with watering.’* |
| Doubts about the environmental benefits of peat-free plants | Scepticism that peat-free options are truly more sustainable due to factors such as long-distance sourcing (e.g., coir), production impacts and waste from short shelf life.  Belief that the amount of peat used personally and by the horticultural industry is minimal and insignificant in overall environmental impact | 8 |  | *‘The impact from the few plants I buy annually is a drop in the ocean compared to the damage being done by huge corporations to the environment and by the use of pesticides and herbicides in industrial farming methods as well as the destruction of habitats for native wildlife for similar purposes. A home gardener using a no dig method to grow their own vegetables organically in their own garden and allotment is neither going to fix nor ruin the world. It is already ruined, what I can do in my short life isn't going to make a flick of difference.’* |
| Plant type influences peat-free consideration | The decision to prioritise peat-free can vary depending on the type of plant being bought (e.g., specialist plants) and how many plants are being bought. This is coupled by the belief that specific plant types (e.g., carnivorous plants and calcifuges) need peat to thrive and alternatives are inadequate. | 14 |  | *‘if I just need a sweet pepper plant for instance I will buy one from my local retailer knowing it isn’t peat free. However if I’m going to buy more than one perennial, shrub, tree I will try to find it online from peat free suppliers.’*  *‘I grow carnivorous plants which naturally grow in peat.’* |
| Concern about consequences of a ban on peat in the UK | Concern that implementation of a ban on peat is unfair and worry about consequences of importing plants | 1 |  | *‘I am annoyed at the way peat free has been foisted on UK growers and worry even more future plants will be imported from countries that don't have the same regulations’* |
| Willingness to still buy peat-grown plants whilst still available | Willingness to buy peat-grown plants while they’re still available, feeling the environmental impact is already done | 2 |  | *‘The plant is already grown when I buy it so any peat involved has already been used, I can’t put it back in the ground.’* |
| **Automatic Motivation** | Not in the habit of reading plant labels | Thinking to check labels of plants for peat content is not a habit when selecting plants | 3 |  | *‘I don’t routinely think to check’* |
| Negative emotional responses to peat-free compost | Aversions to the appearance and texture of peat-free compost, and dislike towards peat-free plants due to previous negative experiences | 4 |  | *‘I don’t like peat free.’*  *‘Plants don’t look as good with a dry dusty surface on the compost.’* |
| Frustration over perceived loss of autonomy in purchasing choices | Frustration over a perceived forced shift towards peat-free products, which they feel undermines freedom to make own purchasing choices | 3 |  | *‘Will not buy peat free plants as my freedom of choice is slowly being taken away’* |

**Supplementary Table 12.** Agreement ratings to supporting a ban on peat-based compost in the UK (n = 918).

| **‘To what extent do you support this ban/restriction on peat?’** | **% (n)** |
| --- | --- |
| Strongly disagree | 4.8 (44) |
| Disagree | 2.2 (20) |
| Somewhat disagree | 4.9 (45) |
| Undecided | 5.7 (52) |
| Somewhat agree | 9.8 (90) |
| Agree | 23.7 (218) |
| Strongly agree | 48.9 (449) |

**Supplementary Table 13.** Suggestions of interventions from respondents mapped to Behaviour Change Wheel Intervention Functions and Policy Categories.

| **Intervention suggestion** | **Description** | **Frequency** | **Example quote** | **Behaviour Change Wheel Intervention Functions and Policy Categories** |
| --- | --- | --- | --- | --- |
| More resources with information about peat-free gardening | General information about peat-free gardening | 32 | *‘Far more word about it, not only within the community of people who, as myself, do or are interested in gardening.’*  *‘Better general education on peat and this transition’* | Education |
| Information about the ingredients of peat-free compost, i.e., ‘what’s in the bag/pot and why?’ | 2 | *‘Understanding what is in peat free compost and quality of the compost better’* | Education |
| Clear and practical information about feeding, watering and plant care when using peat-free compost | 49 | *‘Easy guides to watering, feeding regime changes’*  *‘Perhaps information about what feed I could add to peat free compost to enhance it, although this additive must also be environmentally friendly’* | Education |
| Information and instructions on how to mix packaged peat-free compost with other components such as vermiculite, grit or nutrients to make it more effective | 7 | *‘Learning how to mix with other mediums to manage successful growth for seeds young plants and veg to get watering, draining and feeding right as finding it tricky’* | Education, training |
| Information and instructions on how to make own homemade compost and leaf mould. Specifically, how to ensure the resulting compost is high quality and how to integrate homemade compost into their gardening routines | 5 | *‘More information on home composting’*  *‘More articles in The Garden on leaf litter making and compost methods’* | Education |
| Information on how to specifically address the challenges of seed-starting in peat-free compost | 1 | *‘More information about how to germinate seeds and grow on seedlings in peat from compost - I want to grow my own rather than be forced to buy small plants from garden centres’* | Education |
| Information on how to make peat-free compost work for specific plants, e.g., acid-loving plants | 2 | *‘Don't really use that much peat except where I want the soil to be more acidic. Knowing other (simple for a beginner) ways to create suitable soil for acid-loving plants would be good.’* | Education |
| Brand-specific information for using peat-free compost reflecting the unique properties (e.g., texture) and requirements of each product | 4 | *‘More education, especially from compost manufacturers on how to get best results from their products.’*  *‘In depth information for each brand as to what to change for use of peat free.’* | Education |
| Information on which peat-free products perform best for specific gardening purposes, and quality comparisons between brands | 9 | *‘More easily available info about the best product for specific purposes’*  *‘There are many peat free composts which I have tried and some are very poor. I would like easily accessible information on how to assess the effectiveness of the compost and how best to use it. Currently information is poor I find.’* | Education, persuasion |
| Information on potential pitfalls using peat-free compost, common mistakes and expectations when using peat-free compost | 3 | *‘A more honest and open discussion about the trials and tribulations of using peat free compost’* | Education |
| Information about the environmental harm caused by peat extraction, including persuasive messaging that helps consumers understand and connect with the significance of these impacts | 11 | *‘If I knew more what was ‘bad’ about peat then I’d choose peat free - just like I try to choose free range eggs because I’ve seen conditions of battery hens’*  *‘there needs to be more awareness of the environmental damage caused by peat extraction’* | Education, persuasion |
| Information about the use of peat in the production of commercially sold plants to raise awareness that ‘peat-free’ relates not just to compost but also to plant purchasing | 4 | *‘More education and awareness raising too - for example in a lot of gardening shows and magazine, they often mention peat free compost for tasks. No one really talks about checking how a bought plant is grown however.’* | Education |
| Information for retailers and consumers on how to store peat-free compost to prevent it from deteriorating | 1 | *‘I’ve been using peat free composts for over 20 years but am still concerned at the poor storage, in the open, in the rain, sodden and anaerobic. Suppliers need to understand how to store these products, which are expensive, to retain their composition.’* | Education |
| Tutorials and workshops on peat-free gardening | Free online courses, expert-led tutorials or in-person workshops for gardeners to gain knowledge and skills in using peat-free compost effectively | 9 | *‘Expert led tutorials online or RHS magazine’*  *‘Workshops on sustainable gardening practices’*  *‘Garden Organic free online course’* | Modelling, training |
| Advertising the Responsible Sourcing Scheme (RSS) | Better promotion and visibility of the RSS, on products, at retailers and through advertising. Information on the purpose and benefits of the RSS. | 10 | *‘The RS scheme sounds great - just needs to be applied to all plants, etc’*  *‘More prominent information on responsible sourcing displayed on bagged compost.’* | Education, persuasion, environmental restructuring  Communication / marketing |
| Support and incentives for home composting | Scheme to encourage more home composting, such as a) local council providing free or subsidised compost bins; b) obtaining council produced compost | 9 | *‘A free garden compost bin will be helpful.’*  *‘free good quality compost bins; community based initiatives around composting; good quality, ethically sourced, locally produced peat-free compost.’*  *‘people may be on board if they could buy it at a sensible price from their councils who they give their garden waste and food waste to. No council compost available here.’* | Enablement, incentivisation |
| Initiative to improve and standardise the quality and consistency of peat-free compost | Intervention targeting compost manufacturers and other stakeholders to advance the standardisation of quality peat-free compost (i.e., consistent nutritional value and consistency with good performance at a competitive price) | 156 | *‘Better standards for production of peat free media so that gardeners can be assured of results’*  *‘Just an initiative which could better control the variability of quality of peat free and not find big lumps of plastic or wood in it’* | Environmental restructuring, regulation |
| Greater availability and choice of peat-free compost and plants | Improving availability of high-quality composts and peat-free grown plants at garden centres, nurseries and supermarkets | 60 | *‘I think making peat free ubiquitous at even the big chain stores would help.’*  *‘Wider availability of garden plants that have been grown peat free’*  *‘More retailers selling 100% peat free plants’* | Environmental restructuring |
| Legislation prohibiting sale and use of peat | Banning the sale / reducing the presence of peat-based compost | 49 | *‘Strong regulation meaning peat options are no longer available.’*  *‘If garden centres are forced to adopt it’* | Environmental restructuring, restriction,  legislation |
| Improving visibility of compost quality before purchase | Methods for customers to better assess compost quality in-store, such as physical sample displays or packaging windows, so they can make informed choices and reduce the risk of dissatisfaction post-purchase | 2 | *‘It would be good to see/feel the texture of composts before you buy - eg. a little dish sample to feel in front of each compost option! The texture varies hugely’*  *‘Peat free is hit and miss until you open the bag and see the quality. It’s either gritty based, coco fibre and not great for smaller plants or woody chips which can be too coarse for purpose. A window in the bag would be good’* | Environmental restructuring, enablement |
| Provision of information on peat-free gardening in-store | Clearer and more prominent information about peat-free gardening at garden centres and retailers. Could be in the form of leaflets, signs or posters, and not just digital tools like QR codes via smartphones. | 22 | *‘Information on peat-free gardening provided at garden centres and DIY stores.’*  *‘Not always using QR codes but giving out literature at garden centres etc, as i do not have a smart phone’*  *‘Advisory leaflets regarding alternatives at places where you buy plants and compost’* | Environmental restructuring, education |
| Labelling on peat-free products | Labels on both compost bags and plant tags (at retailers, plant stalls and online) that clearly state ‘peat-free’ or ‘contains peat’.  Labelling to also include actual ingredients, not just what is absent (e.g., peat). This includes specific materials used (e.g., wood bark, coir), nutritional information (e.g., NPK values) and source details | 90 | *‘would like to see better labelling on bought plants and compost so it’s clear what's in bagged compost and how nursery plants are grown’*  *‘Force label if peat is included’*  *‘Better labelling to indicate source and types of compost material contained and NPK values’*  *‘I think it is quite important for compost to be described as what it is, not what it isn't. For example, local authority waste compost is very different from wood-based compost with added soil, but they are both 'peat free'. I think this can cause disappointment if gardeners don't know what they are getting and how to use it.’* | Environmental restructuring, education |
| Clear instructions on packaging and labels on how to water and feed and what to mix compost with for specific tasks such as seed starting | 15 | *‘Specific watering/feeding information on packaging/plants.’*  *‘Ideas on packaging for what to mix it with for different tasks.ie seed mix, potting mix’* | Environmental restructuring, education |
| Clear, easily recognisable visual labelling systems such as traffic light symbols to identify peat-free products and plants quickly | 3 | *‘A specific coloured label that identifies plants grown in peat free compost. With compost in bags, something similar that is easily identified with a cursory glance. Not everyone can read the small print when away from home.’*  *‘Traffic lights need to be clearly displayed on labels (as with electrical goods), not hidden behind QR code.’* | Environmental restructuring, enablement |
| Clear, standardised rating system, such as star ratings, or RHS-endorsed performance scores to help guide purchasing decisions | 3 | *‘some sort of star rating as currently an expensive lottery in terms of buying plus poor plant growth in some cases’*  *‘Official (eg RHS) performance ratings of peat free products on the bags.’* | Environmental restructuring, enablement, persuasion |
| Warning labels to highlight the environmental impact of peat use, e.g., explicit and emotionally evoking messaging, similar to health warnings on cigarette packaging | 2 | *‘Clearer labelling on prepotted plants would be beneficial, I think maybe even a warning of why peat compost is bad on plant labels & compost bags, akin to what cigarette packets have on them’* | Environmental restructuring, education, persuasion |
| In-store signage to promote peat-free products | Clearer, more prominent signage and product-positioning at retailers to help consumers easily identify peat-free products, particularly peat-free plants. Suggestions include dedicated display areas and bold in-store signage | 14 | *‘Perhaps garden centres, nurseries, shops etc should have to display a notice saying that their plants are NOT grown in Peat Free growing media.’*  *‘An area in the garden centre clearly labelled would encourage me to think about buying peat free plants.’* | Environmental restructuring |
| Affordable and competitively priced peat-free products | Cheaper, competitively priced alternatives or price incentives and subsidies to make peat-free products more accessible | 38 | *‘Reduction in price of some peat free composts’*  *‘making it competitively priced. At present it feels like one has to pay a significant premium to get good quality peat free compost’* | Incentivisation, environmental restructuring |
| Trusted trials and evidence of success with peat-free growing | Independent and expert-led trials backed by scientific research on different peat-free compost brands, particularly from trusted organisations like the RHS and individual horticultural figures and influencers | 35 | *‘By gardening experts talking more about what makes a good peat free growing media.’*  *‘Independent trials (not run by the RHS) showing that peat-free is as productive as traditional composts’*  *‘A comprehensive trial by the RHS with peat free and recommendations on how to feed and what feed to use and how often.’* | Education, persuasion, modelling |
| Reviews from other (non-expert) gardeners of using peat-free compost showing successful growing results | 2 | *‘Reviews from other gardeners indicating which products are the most successful’* | Persuasion, modelling |

1. Brown, D. J., Hagger, M. S., & Hamilton, K. (2024). A qualitative investigation of individuals’ lay representations of habit. *Psychology & Health*, 1-22. [↑](#footnote-ref-1)
